# Supplementary material for: Molecular overtones and two-phonon combination bands in the near-infrared spectra of talc, brucite and lizardite
Source: Copernicus journal article supplement (doi:10.5194/ejm-34-627-2022), 2022-12-14
Supplement: Supplementary file 2 [file ejm-34-627-2022-supplement.zip]

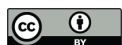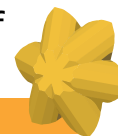

*Supplement of*

**Molecular overtones and two-phonon combination bands in the near-infrared spectra of talc, brucite and lizardite**

**Etienne Balan et al.**

*Correspondence to:* Etienne Balan ([etienne.balan@sorbonne-universite.fr](mailto:etienne.balan@sorbonne-universite.fr))

- [ejm-34-627-2022-supplement-title-page.pdf](#)
- Supplement
  - [Brucite\\_vdw\\_DF2.cif](#)
  - [Supplementary\\_information.pdf](#)
  - [data\\_brucite\\_MIR.txt](#)
  - [data\\_brucite\\_NIR.txt](#)
  - [data\\_lizardite\\_MIR.txt](#)
  - [data\\_lizardite\\_NIR\\_.txt](#)
  - [data\\_talc\\_MIR.txt](#)
  - [data\\_talc\\_NIR.txt](#)
  - [lizardite\\_vdw\\_DF2.cif](#)
  - [talc\\_vdw\\_DF2.cif](#)

The copyright of individual parts of the supplement might differ from the article licence.
